# Supplementary material for: Targeting Lactate Dehydrogenase-B as a Strategy to Fight Cancer: Identification of Potential Inhibitors by In Silico Analysis and In Vitro Screening
Source: MDPI journal article supplement (doi:10.3390/pharmaceutics15102411), 2023-10-01
Supplement: s1 [file s1]

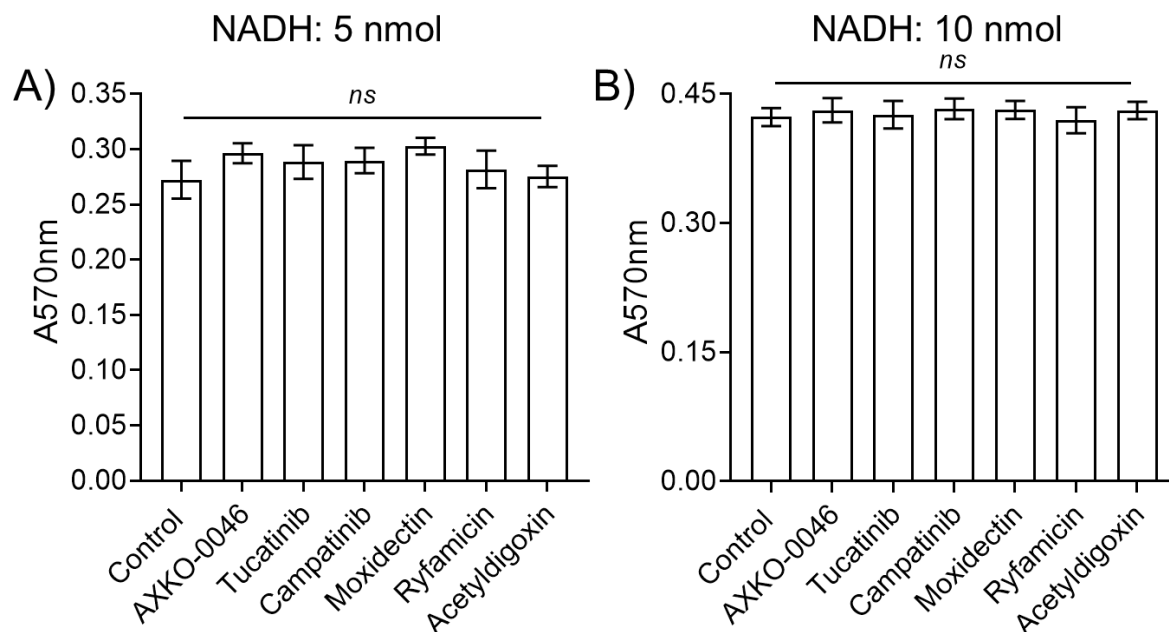

**Supplementary Figure S1.** Effect of potential LDH-B inhibitors on the formation of blue-purple formazan. 1000  $\mu$ M of each compound were mixed with either 5 nmol (A) or 10 nmol (B) of NADH in a final volume of 10  $\mu$ L in the wells of a 96-well plate. Subsequently, 90  $\mu$ L of 50 mM CHES buffer, pH 9.6, supplemented with 150 mM NaCl, 300  $\mu$ M nitroblue tetrazolium (NBT), 30  $\mu$ M phenazine methosulfate (PMS), and 0.13% gelatin. Control wells contained none of the inhibitors. The mixtures were incubated for 5 min at 25  $^{\circ}$ C, and the absorbance at 570 nm was measured. As shown, the presence of all five tested compounds did not interfere with forming the blue-purple formazan derivative. The results are presented as mean values  $\pm$  S.D. (n=3). One-way ANOVA, followed by Dunnett's test for multiple comparisons, was used for statistical analysis.  $p < 0.05$  was considered to be statistically significant. n.s.: not-significant.

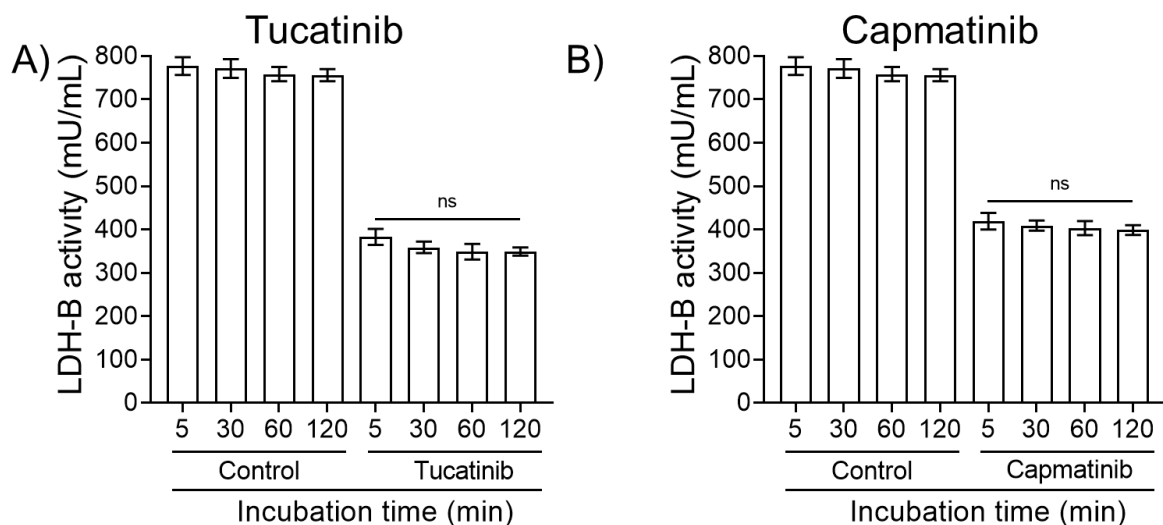

**Supplementary Figure S2.** Effect of pre-incubation time on the inhibitory activity of tucatinib (A) and capmatinib (B) on LDH-B activity. Each of the two compounds (1000  $\mu$ M) was incubated with 2.5 nmol of LHD-B in a final volume of 10  $\mu$ L in the wells of a 96-well plate at the indicated times. Subsequently, 80  $\mu$ L of 50 mM CHES buffer, pH 9.6, supplemented with 150 mM NaCl, 300  $\mu$ M nitroblue tetrazolium (NBT), 30  $\mu$ M (phenazine methosulfate) PMS, and 0.13% gelatin. The reaction was initiated by adding 10  $\mu$ L of substrate mix (10 mM NAD<sup>+</sup> and 250 mM sodium lactate), and LDH-B activity was determined as indicated in the text. The control wells contained none of the inhibitors. The results are presented as mean values  $\pm$  S.D. (n=3). One-way ANOVA, followed by Dunnett's test for multiple comparisons, was used for statistical analysis.  $p < 0.05$  was considered to be statistically significant. n.s.: not-significant.

**Supplementary Table S1.** RMSD\* values of the eight best candidates and free energies of their complexes with the enzyme.

| # | Compound      | RMSD<br>(Å) | Free Energy $\Delta G$<br>(kcal/mol) |
|---|---------------|-------------|--------------------------------------|
| 1 | Tucatinib     | 0.82        | -14.42                               |
| 2 | Capmatinib    | 0.80        | -16.21                               |
| 3 | Moxidectin    | 1.15        | -6.34                                |
| 4 | Rifampicin    | 0.99        | -14.01                               |
| 5 | Acetyldigoxin | 1.21        | -5.88                                |
| 6 | Bictegravir   | 1.14        | -6.01                                |
| 7 | Calicheamicin | 1.55        | -4.87                                |
| 8 | Capreomycin   | 0.89        | -15.12                               |

\*RMSD: Root mean square deviation
